# Supplementary material for: Paradox of glycemic management: multimorbidity, glycemic control, and high-risk medication use among adults with diabetes
Source: PubMed Central journal article supplement — BMJ Open Diabetes Res Care. 2020 Feb 19;8(1):e001007. doi: 10.1136/bmjdrc-2019-001007 (PMC7039576; doi:10.1136/bmjdrc-2019-001007), 2020-02-19
Supplement: bmjdrc-2019-001007supp001.pdf [file bmjdrc-2019-001007supp001.pdf]

## Online-Only Supplemental Material

**Supplementary Table s1. Diagnosis codes used to ascertain study conditions.**

| Health condition                         | ICD-9-CM                                                                                                                                                                                                                           | ICD-10-CM                                                                                                                                                                                                                                     |
|------------------------------------------|------------------------------------------------------------------------------------------------------------------------------------------------------------------------------------------------------------------------------------|-----------------------------------------------------------------------------------------------------------------------------------------------------------------------------------------------------------------------------------------------|
| Dementia                                 | 046.1x, 290.1x, 290.2x, 290.3, 290.4x, 291.2, 292.82, 294.1x, 294.2x, 331.0, 331.1x, 331.2, 331.6, 331.82, 331.89                                                                                                                  | A81.0x, F01.5x, F02.8x, F03.9x, F10.27, F10.97, F13.27, F13.97, F18.97, F19.17, F19.27, F19.97, G30.x, G31.0x, G31.1, G31.83, G31.85                                                                                                          |
|                                          | <i>Adapted from cohort definition in NQF-endorsed quality measure "Antipsychotic Use in Persons with Dementia" and American Academy of Neurology's "Diagnosis (active) dementia group" value set (found in VSAC)</i>               |                                                                                                                                                                                                                                               |
| End-stage renal disease                  | 585.5, 585.6, 403.01, 403.11, 403.91, 404.02, 404.03, 404.12, 404.13, 404.92, 404.93, V45.11                                                                                                                                       | N18.5, N18.6, I12.0, I13.11, I13.2                                                                                                                                                                                                            |
|                                          | <i>Investigator developed algorithm based on clinical expertise and literature review</i>                                                                                                                                          |                                                                                                                                                                                                                                               |
| Chronic kidney disease, stages 3-4       | 585.3, 585.4                                                                                                                                                                                                                       | N18.3, N18.4                                                                                                                                                                                                                                  |
|                                          | <i>Investigator developed algorithm based on clinical expertise and literature review</i>                                                                                                                                          |                                                                                                                                                                                                                                               |
| Myocardial infarction                    | 410.xx, 412                                                                                                                                                                                                                        | I21.xx, I22.x, I25.2                                                                                                                                                                                                                          |
|                                          | <i>Adapted from AHRQ CCS category 100 (1)</i>                                                                                                                                                                                      |                                                                                                                                                                                                                                               |
| Heart failure                            | 398.91, 402.01, 402.11, 402.91, 404.01, 404.03, 404.11, 404.13, 404.91, 404.93, 428.xx                                                                                                                                             | I09.81, I11.0, I13.0, I13.2, I50.xx                                                                                                                                                                                                           |
|                                          | <i>Adapted from the cohort for the NQF-endorsed CMS "Hospital 30-day, all-cause, risk-standardized readmission rate (RSRR) following heart failure (HF) hospitalization" measure (ACO-37; NQF #0330)(2; 3)</i>                     |                                                                                                                                                                                                                                               |
| Cerebrovascular disease                  | 430, 431, 432.x, 433.xx, 434.xx, 435.x, 436, 437.x, 438.xx, V12.54                                                                                                                                                                 | G45.0, G45.1, G45.2, G45.8, G45.9, G46.x, I60.xx, I61.x (except I61.0), I62.xx, I63.xxx, I65.xx, I66.xx, I67.8x (except I67.83, I67.84), I67.9, I69.xxx, Z86.73                                                                               |
|                                          | <i>Adapted from "Cerebrovascular disease, Stroke, TIA" value set from Quality Insights of Pennsylvania (QIP) from VSAC</i>                                                                                                         |                                                                                                                                                                                                                                               |
| Chronic obstructive pulmonary disease    | 490, 491.xx, 492.x, 494.x, 496                                                                                                                                                                                                     | J40, J41.x, J42, J43.x, J44.x, J47.x                                                                                                                                                                                                          |
|                                          | <i>Definition taken from the chronic obstructive pulmonary disease and asthma chronic disease group in the NQF-endorsed CMS "All-Cause Unplanned Admissions for Patients with Multiple Chronic Conditions" measure (ACO-38)(4)</i> |                                                                                                                                                                                                                                               |
| Cancer (except non-melanoma skin cancer) | 14x.xx, 15x.xx, 160.x-165.x, 170.x-172.x, 174.x-176.x, 179-189.x, 19x.xx, 200.xx-208.xx (except 203.x1, 204.x1, 205.x1, 206.x1, 207.x1, 208.x1)                                                                                    | C00.x-C14.x, C15.x-C26.x, C3x.xx, C40.xx-C41.x, C43.x, C4A.xx, C45.x-C49.xx, C50.xxx, C51.x-C58, C60.x-C63.x, C64.x-C68.x, C69.xx-C72.x, C73-C75.x, C76.x-C80.x, C7A.xx, C81.xx-C96.x (except C90.x1, C91.x1, C92.x1, C93.x1, C94.x1, C95.x1) |
|                                          | <i>Taken from AHRQ CCS categories 11-22; 24-43 (1)</i>                                                                                                                                                                             |                                                                                                                                                                                                                                               |

|                           |                                                                                                                                                           |                                                                                                                                                                                                        |
|---------------------------|-----------------------------------------------------------------------------------------------------------------------------------------------------------|--------------------------------------------------------------------------------------------------------------------------------------------------------------------------------------------------------|
| Cirrhosis                 | 571.2, 571.5, 571.6                                                                                                                                       | K70.3x, K74.3, K74.4, K74.5, K74.6x                                                                                                                                                                    |
|                           | <i>Taken from "Cirrhosis" value set from MITRE (found on VSAC)</i>                                                                                        |                                                                                                                                                                                                        |
| Proliferative retinopathy | 361.xx, 362.02, 362.53, 369.xx, 379.23                                                                                                                    | H33.xxx, E11.359x, H35.359, H54.xx, H43.1x                                                                                                                                                             |
|                           | <i>Adapted from Glasheen, et al(5) and the NQF-endorsed CMS "Risk-Standardized Acute Admission Rates for Patients with Diabetes" measure (ACO-36) (6)</i> |                                                                                                                                                                                                        |
| Peripheral neuropathy     | 250.6x, 354.x, 355.x, 356.9, 357.2, 713.5                                                                                                                 | E10.40, E10.42, E11.40, E11.42, E13.42, G56.x, G57.x, G58.x, G60.9, M14.6x                                                                                                                             |
|                           | <i>Adapted from Glasheen, et al(5) and the NQF-endorsed CMS "Risk-Standardized Acute Admission Rates for Patients with Diabetes" measure (ACO-36) (6)</i> |                                                                                                                                                                                                        |
| Hypertension              | 401.x, 402.xx, 403.xx, 404.xx, 405.xx                                                                                                                     | I10, I11.x, I12.x, I13.xx, I15.x, I16.x                                                                                                                                                                |
|                           | <i>Adapted from "Hypertension" value sets from MITRE and Quality Insights of Pennsylvania (found on VSAC)</i>                                             |                                                                                                                                                                                                        |
| Arthritis                 | 711.2x, 714.xx (except 714.81), 715.xx, 720.x, 725                                                                                                        | M05.xxx, M06.xxx, M12.0xx, M35.2, M45.x, M46.1, M46.8x, M46.9x, M49.8x, M35.3                                                                                                                          |
|                           | <i>Taken from AHRQ CCS categories 202-203, 205 (1)</i>                                                                                                    |                                                                                                                                                                                                        |
| Urinary incontinence      | 625.6, 788.30, 788.31, 788.32, 788.33, 788.34, 788.38, 788.39, 788.91                                                                                     | N39.3, N39.41, N39.42, N39.46, N39.490, N39.492, N39.498, R32, R39.81                                                                                                                                  |
|                           | <i>Investigator developed algorithm based on clinical expertise and literature review</i>                                                                 |                                                                                                                                                                                                        |
| Depression                | 311, 290.13, 290.21, 290.43, 296.2x, 296.3x, 296.82, 298.0, 301.12, 309.0, 309.1, 309.28                                                                  | F01.51, F32.xx (except F32.81), F33.xx, F34.8x, F43.21, F43.23                                                                                                                                         |
|                           | <i>Adapted from "Depression" value set from Quality Insights of Pennsylvania (found on VSAC)</i>                                                          |                                                                                                                                                                                                        |
| Falls                     | E88x.x, E987.x                                                                                                                                            | W00.xxxx, W01.xxxx, W03.xxxx, W04.xxxx, W05.xxxx, W06.xxxx, W07.xxxx, W08.xxxx, W09.xxxx, W10.xxxx, W11.xxxx, W12.xxxx, W13.xxxx, W14.xxxx, W15.xxxx, W16.xxxx, W17.xxxx, W18.xxxx, W19.xxxx, Y30.XXXA |
|                           | <i>Investigator developed algorithm based on clinical expertise and literature review</i>                                                                 |                                                                                                                                                                                                        |

*Abbreviations:* ACO, Accountable Care Organization; CCS, Clinical Classification Software ; MI, myocardial infarction; VSAC, United States National Library of Medicine Value Set Authority Center

**Supplementary Table S2. Factors associated with insulin and sulfonylurea use among U.S. adults with diabetes (secondary analysis 1).** Two multivariable logistic regression analyses examined the odds of (1) sulfonylurea without insulin and (2) insulin with or without sulfonylurea use controlling for patient age, sex, race/ethnicity, annual household income, glycosylated hemoglobin (HbA<sub>1c</sub>) level, and type of comorbidity profile. In each model, comorbidity burden was reflected by the Charlson comorbidity index.

|                               | Sulfonylurea (no insulin) |         | Insulin ( $\pm$ sulfonylurea) |         |
|-------------------------------|---------------------------|---------|-------------------------------|---------|
|                               | OR (95% CI)               | p-value | OR (95% CI)                   | p-value |
| <b>Age groups</b>             |                           |         |                               |         |
| 18-44 years                   | Ref                       |         | Ref                           |         |
| 45-64 years                   | 1.07 (1.01, 1.12)         | 0.01    | 0.98 (0.92, 1.03)             | 0.42    |
| 65-74 years                   | 1.24 (1.18, 1.31)         | <0.001  | 0.73 (0.69, 0.77)             | <0.001  |
| $\geq$ 75 years               | 1.31 (1.24, 1.38)         | <0.001  | 0.53 (0.50, 0.56)             | <0.001  |
| <b>Gender</b>                 |                           |         |                               |         |
| Male                          | Ref                       |         | Ref                           |         |
| Female                        | 0.79 (0.77, 0.80)         | <0.001  | 1.12 (1.09, 1.14)             | <0.001  |
| <b>Race</b>                   |                           |         |                               |         |
| White                         | Ref                       |         | Ref                           |         |
| Black                         | 1.01 (0.98, 1.04)         | 0.37    | 1.00 (0.97, 1.03)             | 0.89    |
| Hispanic                      | 1.20 (1.16, 1.23)         | <0.001  | 0.80 (0.77, 0.83)             | <0.001  |
| Asian                         | 1.26 (1.21, 1.32)         | <0.001  | 0.54 (0.51, 0.58)             | <0.001  |
| Unknown                       | 0.96 (0.91, 1.01)         | 0.14    | 0.74 (0.70, 0.79)             | <0.001  |
| <b>Household income</b>       |                           |         |                               |         |
| <\$40,000                     | Ref                       |         | Ref                           |         |
| \$40,000-\$49,999             | 1.00 (0.97, 1.04)         | 0.84    | 0.87 (0.83, 0.91)             | <0.001  |
| \$50,000-\$59,999             | 0.98 (0.94, 1.02)         | 0.38    | 0.87 (0.83, 0.91)             | <0.001  |
| \$60,000-\$74,999             | 0.94 (0.91, 0.98)         | 0.001   | 0.88 (0.84, 0.92)             | <0.001  |
| \$75,000-\$99,999             | 0.95 (0.91, 0.98)         | 0.003   | 0.82 (0.79, 0.86)             | <0.001  |
| $\geq$ \$100,000              | 0.87 (0.84, 0.90)         | <0.001  | 0.80 (0.77, 0.83)             | <0.001  |
| Unknown                       | 0.90 (0.86, 0.94)         | <0.001  | 0.96 (0.91, 1.01)             | 0.16    |
| <b>HbA<sub>1c</sub> range</b> |                           |         |                               |         |
| $\leq$ 5.6%                   | 0.51 (0.48, 0.54)         | <0.001  | 0.45 (0.42, 0.49)             | <0.001  |
| 5.7 - 6.4%                    | 0.59 (0.57, 0.61)         | <0.001  | 0.49 (0.47, 0.51)             | <0.001  |
| 6.5 - 6.9%                    | Ref                       |         | Ref                           |         |
| 7.0 - 7.9%                    | 1.46 (1.42, 1.51)         | <0.001  | 2.38 (2.30, 2.47)             | <0.001  |
| 8.0 - 8.9%                    | 1.36 (1.31, 1.41)         | <0.001  | 5.18 (4.97, 5.40)             | <0.001  |
| 9.0 - 9.9%                    | 1.13 (1.07, 1.19)         | <0.001  | 7.79 (7.40, 8.20)             | <0.001  |
| $\geq$ 10.0%                  | 0.99 (0.94, 1.04)         | 0.70    | 9.38 (8.93, 9.85)             | <0.001  |

| Charlson index | Ref               |        | Ref               |        |
|----------------|-------------------|--------|-------------------|--------|
|                |                   |        |                   |        |
| 0-1            |                   |        |                   |        |
| 2              | 0.90 (0.87, 0.93) | <0.001 | 1.39 (1.33, 1.45) | <0.001 |
| 3              | 0.93 (0.90, 0.96) | <0.001 | 2.16 (2.08, 2.24) | <0.001 |
| ≥4             | 0.82 (0.79, 0.84) | <0.001 | 3.92 (3.80, 4.05) | <0.001 |

**Supplementary Table S3. Factors associated with insulin and sulfonylurea use among U.S. adults with diabetes (secondary analysis 2).** Three multivariable logistic regression analyses examined the odds of (1) sulfonylurea without insulin and (2) insulin with or without sulfonylurea use controlling for patient age, sex, race/ethnicity, annual household income, glycosylated hemoglobin (HbA<sub>1c</sub>) level, and type of comorbidity profile. In each model, patients were categorized as having only diabetes-concordant, only diabetes-discordant, both concordant and discordant, or any advanced comorbidities. SU, sulfonylurea.

|                               | SU (no insulin)   |         | Insulin ( $\pm$ SU) |         |
|-------------------------------|-------------------|---------|---------------------|---------|
|                               | OR (95% CI)       | p-value | OR (95% CI)         | p-value |
| <b>Age groups</b>             |                   |         |                     |         |
| 18-44 years                   | Ref               |         | Ref                 |         |
| 45-64 years                   | 1.07 (1.02, 1.13) | 0.008   | 1.02 (0.97, 1.08)   | 0.43    |
| 65-74 years                   | 1.24 (1.17, 1.30) | <0.001  | 0.87 (0.82, 0.92)   | <0.001  |
| $\geq$ 75 years               | 1.30 (1.23, 1.37) | <0.001  | 0.70 (0.66, 0.74)   | <0.001  |
| <b>Gender</b>                 |                   |         |                     |         |
| Male                          | Ref               |         | Ref                 |         |
| Female                        | 0.80 (0.78, 0.82) | <0.001  | 1.06 (1.03, 1.09)   | <0.001  |
| <b>Race</b>                   |                   |         |                     |         |
| White                         | Ref               |         | Ref                 |         |
| Black                         | 1.01 (0.98, 1.04) | 0.63    | 1.02 (0.98, 1.05)   | 0.33    |
| Hispanic                      | 1.18 (1.15, 1.22) | <0.001  | 0.87 (0.84, 0.90)   | <0.001  |
| Asian                         | 1.24 (1.19, 1.30) | <0.001  | 0.56 (0.53, 0.60)   | <0.001  |
| Unknown                       | 0.96 (0.90, 1.01) | 0.11    | 0.75 (0.71, 0.80)   | <0.001  |
| <b>Household income</b>       |                   |         |                     |         |
| <\$40,000                     | Ref               |         | Ref                 |         |
| \$40,000-\$49,999             | 1.01 (0.97, 1.04) | 0.77    | 0.85 (0.82, 0.89)   | <0.001  |
| \$50,000-\$59,999             | 0.98 (0.95, 1.02) | 0.44    | 0.85 (0.81, 0.89)   | <0.001  |
| \$60,000-\$74,999             | 0.94 (0.91, 0.98) | 0.001   | 0.84 (0.81, 0.88)   | <0.001  |
| \$75,000-\$99,999             | 0.95 (0.92, 0.98) | 0.004   | 0.78 (0.75, 0.81)   | <0.001  |
| $\geq$ \$100,000              | 0.87 (0.84, 0.90) | <0.001  | 0.74 (0.72, 0.77)   | <0.001  |
| Unknown                       | 0.90 (0.86, 0.94) | <0.001  | 0.94 (0.89, 0.99)   | 0.02    |
| <b>HbA<sub>1c</sub> range</b> |                   |         |                     |         |
| $\leq$ 5.6%                   | 0.51 (0.48, 0.55) | <0.001  | 0.47 (0.44, 0.51)   | <0.001  |
| 5.7 - 6.4%                    | 0.60 (0.58, 0.61) | <0.001  | 0.49 (0.47, 0.51)   | <0.001  |
| 6.5 - 6.9%                    | Ref               |         | Ref                 |         |
| 7.0 - 7.9%                    | 1.45 (1.41, 1.50) | <0.001  | 2.40 (2.32, 2.49)   | <0.001  |
| 8.0 - 8.9%                    | 1.34 (1.29, 1.39) | <0.001  | 5.29 (5.08, 5.51)   | <0.001  |

## Page 6 of 7

|                                           |                   |        |                   |        |
|-------------------------------------------|-------------------|--------|-------------------|--------|
| 9.0 - 9.9%                                | 1.11 (1.06, 1.17) | <0.001 | 7.81 (7.42, 8.21) | <0.001 |
| ≥10.0%                                    | 0.98 (0.93, 1.02) | 0.33   | 9.33 (8.88, 9.79) | <0.001 |
| <b>Type and degree of multi-morbidity</b> |                   |        |                   |        |
| No comorbidities                          | Ref               |        | Ref               |        |
| Concordant only                           | 0.98 (0.95, 1.02) | 0.40   | 1.97 (1.87, 2.07) | <0.001 |
| Discordant only                           | 0.89 (0.83, 0.96) | 0.002  | 1.33 (1.21, 1.47) | <0.001 |
| Concordant & discordant                   | 0.81 (0.78, 0.85) | <0.001 | 2.87 (2.72, 3.03) | <0.001 |
| Advanced ± concordant/discordant          | 0.78 (0.74, 0.82) | <0.001 | 3.33 (3.14, 3.53) | <0.001 |

**References for the Online-Only Supplemental Material**

1. Clinical Classifications Software (CCS), 2015 [article online], 2016. Available from <http://www.hcup-us.ahrq.gov/toolssoftware/ccs/ccs.jsp>. Accessed September 5 2018
2. NQF #0330 Centers for Medicare & Medicaid Services (CMS) "Hospital 30-day, all-cause, risk-standardized readmission rate (RSRR) following heart failure (HF) hospitalization" measure [article online], 2018. Available from <http://www.qualityforum.org/>. Accessed September 7 2018
3. Accountable Care Organization (ACO) #37 Risk-Standardized Acute Admission Rates for Patients With Heart Failure. Version 2.0 [article online], 2015. Available from <https://www.cms.gov/Medicare/Medicare-Fee-for-Service-Payment/sharedsavingsprogram/Downloads/ACO-37.pdf>. Accessed September 7 2018
4. Accountable Care Organization (ACO) #38 Risk-Standardized Acute Admission Rates for Patients With Multiple Chronic Conditions. Version 2.0 [article online], 2015. Available from <https://www.cms.gov/Medicare/Medicare-Fee-for-Service-Payment/sharedsavingsprogram/Downloads/ACO-38.pdf>. Accessed September 7 2018
5. Glasheen WP, Renda A, Dong Y: Diabetes Complications Severity Index (DCSI)-Update and ICD-10 translation. *J Diabetes Complications* 2017;31:1007-1013
6. Accountable Care Organization (ACO) #36 Risk-Standardized Acute Admission Rates for Patients With Diabetes [article online], 2015. Available from <https://www.cms.gov/Medicare/Medicare-Fee-for-Service-Payment/sharedsavingsprogram/Downloads/ACO-36.pdf>. Accessed September 5 2018
